# Supplementary material for: Non-typeable Haemophilus influenzae major outer membrane protein P5 contributes to bacterial membrane stability, and affects the membrane protein composition crucial for interactions with the human host
Source: PubMed Central journal article supplement (PMC10250671; doi:10.3389/fcimb.2023.1085908), 2023-05-26
Supplement: DataSheet_1.pdf [file DataSheet_1.pdf]

## SUPPORTING MATERIALS

### Title:

**Non-typeable *Haemophilus influenzae* major outer membrane protein P5 contributes to bacterial membrane stability, and affects the membrane protein composition crucial for interactions with the human host**

### Authors:

Yu-Ching Su<sup>1†</sup>, Mahendar Kadari<sup>1†</sup>, Megan L. Straw<sup>1</sup>, Martina Janoušková<sup>1</sup>, Sandra Jonsson<sup>1</sup>, Oskar Thofte<sup>1</sup>, Farshid Jalalvand<sup>1</sup>, Erika Matuschek<sup>2</sup>, Linda Sandblad<sup>3</sup>, Ákos Végvári<sup>4</sup>, Roman A. Zubarev<sup>4</sup>, and Kristian Riesbeck<sup>1\*</sup>

<sup>1</sup>Clinical Microbiology, Department of Translational Medicine, Faculty of Medicine, Lund University, Jan Waldenströms gata 59, SE-205 02 Malmö, Sweden.

<sup>2</sup>EUCAST Development Laboratory, c/o Clinical Microbiology, Central Hospital, SE-351 85 Växjö, Sweden.

<sup>3</sup>Department of Chemistry and The Laboratory for Molecular Infection Medicine Sweden (MIMS), Umeå Centre for Microbial Research (UCMR), Umeå University, 90187 Umeå, Sweden.

<sup>4</sup>Proteomics Biomedicum, Division of Physiological Chemistry I, Department of Medical Biochemistry & Biophysics (MBB), Karolinska Institute, Stockholm, 171 65, Sweden.

†These authors contributed equally.

### \*CORRESPONDENCE

Kristian Riesbeck

Email: kristian.riesbeck@med.lu.se

**Article type:** Brief Research Report

## SUPPORTING TABLES

TABLE S1: List of bacterial strains used in this study.

| Bacterial strain <sup>a, b</sup>  | Description/ genotype <sup>c</sup>                                                                                                                                                        | Reference           |
|-----------------------------------|-------------------------------------------------------------------------------------------------------------------------------------------------------------------------------------------|---------------------|
| NTHi 3655                         | Otitis media clinical isolate from a 10-year-old child.                                                                                                                                   | Musser et al., 1986 |
| NTHi 3655 $\Delta p5$             | Cm <sup>R</sup> . Isogenic <i>p5</i> deletion mutant of NTHi 3655 by <i>cat</i> replacement. The strain is lack of P5 expression.                                                         | Thofte et al., 2021 |
| NTHi 3655 $\Delta p5^{CTD}$       | Cm <sup>R</sup> . Isogenic mutant of NTHi 3655. The <i>p5<sup>CTD</sup></i> is replaced by <i>cat</i> . The mutant expresses CTD-truncated P5.                                            | This study          |
| NTHi 3655 $\Delta p5::p5$         | Zeo <sup>R</sup> . <i>p5</i> -trans-complemented isogenic mutant of NTHi 3655 $\Delta p5$ . The strain has a restored P5 expression as detected by SDS-PAGE and western blotting.         | This study          |
| <i>E. coli</i> DH5 $\alpha$       | Used for general cloning and maintenance of plasmids.                                                                                                                                     |                     |
| <i>E. coli</i> BL21 (DE3)         | Used for protein expression upon induction with IPTG.                                                                                                                                     |                     |
| <i>E. coli</i> -pET26b            | Kan <sup>R</sup> . <i>E. coli</i> BL21 (DE3) bearing the empty vector pET-26b.                                                                                                            |                     |
| <i>E. coli</i> -P4                | Kan <sup>R</sup> . <i>E. coli</i> BL21 (DE3) bearing recombinant plasmid of pET26(b)+ with <i>hel</i> ORF (NTHi 3655) insert. The clone expresses His-tagged P4.                          | Su et al., 2016     |
| <i>E. coli</i> -P5 <sup>CTD</sup> | Kan <sup>R</sup> . <i>E. coli</i> BL21 (DE3) bearing recombinant plasmid of pET26(b)+ with <i>p5<sup>CTD</sup></i> ORF (NTHi 3655) insert. The clone expresses His-tagged CTD-deleted P5. | This study          |
| <i>E. coli</i> -P6                | Kan <sup>R</sup> . <i>E. coli</i> BL21 (DE3) bearing recombinant plasmid of pET26(b)+ with <i>p6</i> ORF (NTHi 3655) insert. The clone expresses His-tagged P6.                           | Su et al., 2019     |

<sup>a</sup> Non-typeable *Haemophilus influenzae* (NTHi) wild type and mutant strains were grown on chocolate agar or cultured in brain heart infusion (BHI) broth supplemented with NAD (Sigma-Aldrich) and hemin (Merck, Darmstadt, Germany) each at 10  $\mu$ g/mL at 37°C in a humid atmosphere containing 5% CO<sub>2</sub>.

<sup>b</sup> *Escherichia coli* (*E. coli*) strains were grown in Luria-Bertani agar or media at 37°C.

<sup>c</sup> Concentrations of antibiotics used: 10 µg/ml Cm; 50 µg/ml Kan; 4 µg/ml Zeo. Cm, chloramphenicol; Kan, kanamycin; Zeo, zeocin; <sup>R</sup>, Resistant.

Table S2. List of primers used.

| Primer                                                                                             | Sequence 5'-3'                                                | Amplicon <sup>d</sup>                                                                                                                                                                                                                             |
|----------------------------------------------------------------------------------------------------|---------------------------------------------------------------|---------------------------------------------------------------------------------------------------------------------------------------------------------------------------------------------------------------------------------------------------|
| <b>Construction of the <i>p5</i><sup>CTD</sup>-deletion and <i>p5</i>-transcomplemented mutant</b> |                                                               |                                                                                                                                                                                                                                                   |
| KR-1_forward <sup>a</sup>                                                                          | CGCTGTTATCCGTAGCCAGACTTAATCTATCCGAATAAT                       | Fragment A: upstream region of <i>p5</i> , and <i>p5</i> gene (nt 1-696) lacking the CTD (nt 697-1080). 3' end of the amplicon overlapped with the 5' sequence of <i>cat</i> .                                                                    |
| KR-2_reverse                                                                                       | TTGTTG<br>GAAGAAAAAAGTTCAATTTATTATTCAGGTGCTGCAACA<br>ACTGGTGC |                                                                                                                                                                                                                                                   |
| KR-3_forward                                                                                       | GTTGTTGCAGCACCTGAATAATAAATTGAACTTTTTTCTT                      | Fragment $\rho_{omp26-cat}$ : ORF of <i>cat</i> . 5' end of the amplicon overlapped with the 3' sequence of <i>p5</i> (nt 1-696) that lack of CTD. The 3' end of amplicon overlapped with the 5' sequence of the downstream region of <i>p5</i> . |
| KR-4_reverse                                                                                       | CATCAG<br>GTAAACGAATACTAAAATTACGCCCCGCCCTGCCACTC<br>ATCG      |                                                                                                                                                                                                                                                   |
| KR-5_forward                                                                                       | GGCAGGGCGGGGCGTAATTTTAGTATTCGTTTAACGAAA                       | Fragment B: downstream flanking region of <i>p5</i> . 5' end of the amplicon overlapped with 3' sequence of <i>cat</i> .                                                                                                                          |
| KR-6_reverse <sup>a</sup>                                                                          | G<br>CTATGGCTTGGCAGGTTTACGCATTGGTTATGCGGTATC<br>TAATCC        |                                                                                                                                                                                                                                                   |
| KR-7_reverse                                                                                       | GACCACCATTGCCCCATATTTATTTAGTACCGTTTACCG<br>CGATTTC            | Paired with KR-1_forward to amplify the upstream region of <i>p5</i> , and <i>p5</i> gene. The amplicon is labelled as Fragment D. 3' end of the amplicon overlapped with 5' sequence of <i>bleO</i> .                                            |
| KR-8_forward                                                                                       | CGGTAAACGGTACTAAATAAATATGGGGCAAATGGTGG<br>TCACCATCC           | Fragment $\rho_{bla_{TEM}}-bleO$ : complete ORF of <i>bleO</i> . 5' end of the amplicon overlapped                                                                                                                                                |

|                                                                          |                                                  |                                                                                                                                                                                                                                                                      |
|--------------------------------------------------------------------------|--------------------------------------------------|----------------------------------------------------------------------------------------------------------------------------------------------------------------------------------------------------------------------------------------------------------------------|
| KR-9_reverse                                                             | CCAGTGATTTTTTCTCTCAGTCCTGCTCCTCGGCCACGA<br>AGTG  | with the 3' end sequence of <i>p5</i> . 3' end of the amplicon overlapped with the 5' sequence of <i>cat</i> (that lack of promoter and ATG).                                                                                                                        |
| KR-10_reverse                                                            | CCGAGGAGCAGGACTGAGAGAAAAAATCACTGGATAT<br>ACCACCG | Paired with KR-6_reverse to amplify truncated ORF of <i>cat</i> (lack of promoter and ATG) and the downstream flanking region of <i>p5</i> . The yielded amplicon is labelled as Fragment E. 3' end of the amplicon overlapped with 3' end sequence of <i>bleO</i> . |
| <b>Cloning of full-length and P5<sup>CTD</sup> fragments into pET26b</b> |                                                  |                                                                                                                                                                                                                                                                      |
| KR-11_forward <sup>b</sup>                                               | CGGCGGATCCGATGGTAAGCAA <sup>b</sup> ACTTTCAG     | Complete ORF of <i>p5</i> <sup>CTD</sup> (M233-K359)                                                                                                                                                                                                                 |
| KR-12_reverse <sup>c</sup>                                               | CCCCAAGCTTTT <sup>c</sup> TAGTACCGTTACCGCGA      |                                                                                                                                                                                                                                                                      |

<sup>a</sup> The primer pair were used to generate linear DNA as a mutation vector in knocking out *p5*<sup>CTD</sup> and *p5* transcomplementation in NTHi 3655 and NTHi 3655Δ*p5*, respectively.

<sup>b, c</sup> Restriction enzyme cutting sites are underlined. <sup>b</sup>*Bam*HI, <sup>c</sup>*Hind*III

<sup>d</sup> Amplicon labelling is based on description in Figure S1.

**Table S3:** Label free proteomic analysis for comparison of relative abundance of membrane proteins between NTHi 3655 and NTHi 3655 $\Delta$ p5 with focus on the first 50 most abundance proteins identified in the wild type and some other important virulent factors.

| Locus tag <sup>a</sup> | GenBank accession number | Protein description <sup>b, c</sup>                                                           | NTHi 3655 wild type              |                                            | NTHi 3655 $\Delta$ p5            |                                            |
|------------------------|--------------------------|-----------------------------------------------------------------------------------------------|----------------------------------|--------------------------------------------|----------------------------------|--------------------------------------------|
|                        |                          |                                                                                               | Abundance <sup>d</sup> (grouped) | Ranking of relative abundance <sup>c</sup> | Abundance <sup>d</sup> (grouped) | Ranking of relative abundance <sup>c</sup> |
| CGSHi3655_06069        | EDJ92910                 | <b>Outer membrane protein P5</b>                                                              | 63273540915                      | 1                                          | n.d.                             | -                                          |
| CGSHi3655_08469        | EDJ92095                 | Elongation factor Tu                                                                          | 22560309347                      | 2                                          | 6328607399                       | 6                                          |
| CGSHi3655_04579        | EDJ92235                 | <b>Lipoprotein E (P4)</b>                                                                     | 20203504544                      | 3                                          | 9058056604                       | 4                                          |
| CGSHi3655_05074        | EDJ92441                 | Elongation factor G                                                                           | 16421155426                      | 4                                          | 9403018225                       | 2                                          |
| CGSHi3655_06999        | EDJ93618                 | D-galactose-binding periplasmic protein                                                       | 15436745601                      | 5                                          | 4480807308                       | 12                                         |
| CGSHi3655_05494        | EDJ92795                 | <b>HMW1B, OMP-85-like protein required for secretion of HMW1A and HMW2A</b>                   | 13939232618                      | 6                                          | 4909453976                       | 11                                         |
| CGSHi3655_02399        | EDJ93375                 | <b>Peptidoglycan-associated protein (P6)</b>                                                  | 12354893925                      | 7                                          | 6029515187                       | 7                                          |
| CGSHi3655_06394        | EDJ92975                 | Cysteine synthase                                                                             | 11677252146                      | 8                                          | 1445383519                       | 31                                         |
| CGSHi3655_07569        | EDJ93732                 | <b>Outer membrane protein assembly factor BamA</b>                                            | 11322736675                      | 9                                          | 4379086597                       | 13                                         |
| CGSHi3655_05044        | EDJ92435                 | 2',3'-cyclic nucleotide 2'-phosphodiesterase/3'-nucleotidase bifunctional periplasmic protein | 10245205879                      | 10                                         | 2282686411                       | 20                                         |
| CGSHi3655_07554        | EDJ93729                 | Elongation factor Ts                                                                          | 10194083052                      | 11                                         | 5326075349                       | 9                                          |
| CGSHi3655_04549        | EDJ92229                 | <b>Glycerophosphoryl diester phosphodiesterase (PD)</b>                                       | 8796305964                       | 12                                         | 9214407784                       | 3                                          |
| CGSHi3655_07564        | EDJ93731                 | <b>Outer membrane protein 26</b>                                                              | 8754998794                       | 13                                         | 1024683915                       | 50                                         |
| CGSHi3655_03601        | EDJ92719                 | <b>Periplasmic serine endoprotease DegP-like</b>                                              | 8753653475                       | 14                                         | 375812250,7                      | 109                                        |
| CGSHi3655_05489        | EDJ92794                 | <b>HMW2A, high molecular weight adhesin 2</b>                                                 | 8737357155                       | 15                                         | 591026186,1                      | 76                                         |
| CGSHi3655_04941        | EDJ92418                 | <b>Outer membrane protein assembly factor BamD</b>                                            | 7153998442                       | 16                                         | 1187515572                       | 39                                         |

|                 |          |                                                                            |            |    |             |    |
|-----------------|----------|----------------------------------------------------------------------------|------------|----|-------------|----|
| CGSHi3655_04450 | EDJ92617 | L-lactate dehydrogenase                                                    | 7021859704 | 17 | 1789411336  | 25 |
| CGSHi3655_05279 | EDJ92482 | Chaperonin GroEL                                                           | 6685334173 | 18 | 3114618508  | 15 |
| CGSHi3655_01874 | EDJ93270 | Uridine phosphorylase                                                      | 6543015797 | 19 | 2180182518  | 22 |
| CGSHi3655_01709 | EDJ93237 | Excinuclease ABC subunit A                                                 | 6019392563 | 20 | 1560470448  | 27 |
| CGSHi3655_01201 | EDJ92152 | MetQ/NlpA family lipoprotein                                               | 5994694377 | 21 | 6650014269  | 5  |
| CGSHi3655_05369 | EDJ92500 | Phosphoglycerate kinase                                                    | 5586139195 | 22 | 2473946498  | 19 |
| CGSHi3655_05664 | EDJ92829 | Putative ABC-type Co <sup>2+</sup> transport system, periplasmic component | 5540286273 | 23 | 1201029652  | 38 |
| CGSHi3655_06269 | EDJ92950 | Oligopeptide ABC transporter substrate-binding protein OppA                | 5319394999 | 24 | 688716870,2 | 66 |
| CGSHi3655_04706 | EDJ92371 | High-affinity zinc uptake system protein ZnuA                              | 4909379862 | 25 | 2793166523  | 16 |
| CGSHi3655_03836 | EDJ92766 | Penicillin-binding protein activator LpoA                                  | 4823698873 | 26 | 1338065089  | 33 |
| CGSHi3655_00570 | EDJ92186 | NAD nucleotidase                                                           | 4704096353 | 27 | 5439999029  | 8  |
| CGSHi3655_08691 | EDJ92991 | hypothetical protein                                                       | 4145406674 | 28 | 2591290365  | 18 |
| CGSHi3655_02404 | EDJ93376 | Tol-Pal system protein TolB                                                | 3897001650 | 29 | 1138781908  | 44 |
| CGSHi3655_04816 | EDJ92393 | Sialic acid-binding periplasmic protein SiaP                               | 3734750382 | 30 | 1899973049  | 24 |
| CGSHi3655_02879 | EDJ93471 | <b>Putative peptidyl-prolyl cis-trans isomerase SurA</b>                   | 3679725016 | 31 | 753851102,3 | 63 |
| CGSHi3655_08696 | EDJ92992 | TolC family protein                                                        | 3592711694 | 32 | 1528967870  | 28 |
| CGSHi3655_07154 | EDJ93649 | Heme-binding lipoprotein A                                                 | 3517846202 | 33 | 1694747309  | 26 |
| CGSHi3655_04781 | EDJ92386 | <b>Outer membrane protein P2</b>                                           | 3387090222 | 34 | 67955891362 | 1  |
| CGSHi3655_09651 | EDJ93183 | Pyruvate kinase                                                            | 3381401103 | 35 | 1264870880  | 35 |
| CGSHi3655_03731 | EDJ92745 | Dihydrolipoyl dehydrogenase ProA                                           | 3359720363 | 36 | 2277343226  | 21 |
| CGSHi3655_06264 | EDJ92949 | Transaldolase                                                              | 3025891987 | 37 | 479268613,8 | 88 |
| CGSHi3655_08314 | EDJ93881 | Amino acid ABC transporter-binding protein                                 | 2982221337 | 38 | 1087664607  | 49 |
| CGSHi3655_00986 | EDJ92330 | 5-methyltetrahydropteroyltriglutamate--homocysteine methyltransferase MetE | 2835397047 | 39 | 1116048797  | 46 |

|                 |          |                                                                          |             |     |             |     |
|-----------------|----------|--------------------------------------------------------------------------|-------------|-----|-------------|-----|
| CGSHi3655_05804 | EDJ92857 | TonB-dependent receptor                                                  | 2736273449  | 40  | 2632016223  | 17  |
| CGSHi3655_06934 | EDJ93605 | Phosphoenolpyruvate carboxykinase (ATP)                                  | 2708640725  | 41  | 1105107534  | 47  |
| CGSHi3655_03721 | EDJ92743 | Pyruvate dehydrogenase E1 component                                      | 2678334158  | 42  | 1231110748  | 36  |
| CGSHi3655_00871 | EDJ92307 | UPF0319 protein                                                          | 2664344595  | 43  | 605240104,3 | 75  |
| CGSHi3655_02099 | EDJ93315 | Aspartate--tRNA ligase                                                   | 2583121050  | 44  | 1136744244  | 45  |
| CGSHi3655_01714 | EDJ93238 | <b>Adhesion and penetration protein autotransporter (Hap)</b>            | 2535701286  | 45  | 382770496,2 | 104 |
| CGSHi3655_08881 | EDJ93029 | DUF4198 domain-containing protein                                        | 2523546907  | 46  | 1012219900  | 52  |
| CGSHi3655_06644 | EDJ93547 | 2,3-bisphosphoglycerate-dependent phosphoglycerate mutase                | 2518737292  | 47  | 1224549133  | 37  |
| CGSHi3655_08359 | EDJ93890 | Superoxide dismutase                                                     | 2486297747  | 48  | 522943169,8 | 86  |
| CGSHi3655_07834 | EDJ93785 | Isoleucine--tRNA ligase                                                  | 2482204444  | 49  | 2060506122  | 23  |
| CGSHi3655_06899 | EDJ93598 | DNA-directed RNA polymerase subunit alpha RpoA                           | 2448770522  | 50  | 998807096,6 | 53  |
| CGSHi3655_00690 | EDJ92210 | <b>IgA-specific metalloendopeptidase</b>                                 | 1947199498  | 60  | 377111850   | 107 |
| CGSHi3655_01412 | EDJ92275 | Iron-utilization periplasmic protein (FbpA)                              | 1907680017  | 61  | 431354774,4 | 94  |
| CGSHi3655_02499 | EDJ93395 | Outer membrane protein P1                                                | 1823558206  | 63  | 4931102179  | 10  |
| CGSHi3655_00220 | EDJ91974 | <b>HMW1A, high molecular weight adhesin 1</b>                            | 1397988164  | 77  | 132175165,5 | 181 |
| CGSHi3655_02309 | EDJ93357 | <b>Putative metal ABC transporter substrate-binding protein Hpf (PF)</b> | 1390388270  | 78  | 1471424118  | 30  |
| CGSHi3655_01754 | EDJ93246 | <b>Outer membrane protein assembly factor BamC homolog</b>               | 1112081052  | 89  | 208789176,3 | 146 |
| CGSHi3655_07079 | EDJ93634 | <b>Outer membrane protein assembly factor BamE</b>                       | 1109128392  | 90  | 380033207,3 | 106 |
| CGSHi3655_08034 | EDJ93825 | Periplasmic chaperone PpiD                                               | 1091387249  | 91  | 175981229,2 | 158 |
| CGSHi3655_00724 | EDJ92122 | Putative phospholipid-binding lipoprotein MlaA (VacJ lipoprotein)        | 764456279,3 | 116 | 544954934,5 | 83  |



|                 |          |                                                                                                 |             |     |             |     |
|-----------------|----------|-------------------------------------------------------------------------------------------------|-------------|-----|-------------|-----|
| CGSHi3655_09751 | EDJ93203 | Outer-membrane lipoprotein carrier protein<br>LolA                                              | 734889130,3 | 119 | 872556046,1 | 58  |
| CGSHi3655_03980 | EDJ91973 | <b>HMW2A, high molecular weight adhesin 2</b>                                                   | 644855575,3 | 130 | 158420187   | 169 |
| CGSHi3655_07159 | EDJ93650 | Putative heme iron utilization protein                                                          | 532735594,6 | 153 | 408338555,3 | 99  |
| CGSHi3655_04936 | EDJ92417 | <b>Surface-adhesin protein E (PE)</b>                                                           | 446304219,8 | 164 | 267039998,1 | 127 |
| CGSHi3655_01624 | EDJ93220 | Lipoprotein NlpI                                                                                | 424601766,4 | 170 | 62492455,21 | 245 |
| CGSHi3655_00754 | EDJ92128 | Hemoglobin-haptoglobin binding protein B<br>(HgpB)                                              | 115684374   | 342 | 107814220,6 | 200 |
| CGSHi3655_06234 | EDJ92943 | <b>Peptidoglycan D,D-transpeptidase FtsI<br/>(PBP3)</b>                                         | 112308129,9 | 346 | 152716521   | 170 |
| CGSHi3655_02684 | EDJ93432 | Penicillin-binding protein 1A (PBP1A)                                                           | 92931801,31 | 375 | n.d.        | -   |
| CGSHi3655_07474 | EDJ93713 | Multidrug resistance protein A                                                                  | 89552839,03 | 381 | n.d.        | -   |
| CGSHi3655_01794 | EDJ93254 | Heme/hemopexin-binding protein A (HxuA)                                                         | 69316855,02 | 425 | 13519913,15 | 383 |
| CGSHi3655_04260 | EDJ92579 | Serine-type D-Ala-D-Ala carboxypeptidase<br>(PBP5)                                              | 68766358,72 | 427 | 3009893,808 | 490 |
| CGSHi3655_05499 | EDJ92796 | <b>HMW2C, putative glycosyltransferase<br/>involved in glycosylation of HMW1A and<br/>HMW2A</b> | 61910223,84 | 451 | n.d.        | -   |

<sup>a</sup> Locus tag is based on the genomic annotation of NTHi 3655 at GenBank (NCBI Reference sequence: NZ\_AAZF00000000.1).

<sup>b</sup> Proteins that were mentioned and discussed in the main text are highlighted in bold font.

<sup>c</sup> Identified proteins are ordered by their relative abundance on their first identification in NTHi 3655 wild type. -, no information.

<sup>d</sup> Protein abundance was calculated from the sum of all unique normalised peptide ion abundances for a specific protein on each run; data represent the grouped abundance from three replicate samples. n.d., not detected.

## SUPPORTING METHODOLOGY

### Sample Preparation for Proteomic Analysis

Three replicates of membrane fraction sample from NTHi wild-type and mutant, in 130  $\mu$ l of 100 mM Tris-HCl, pH 8.2, with protease inhibitors were supplemented with 20  $\mu$ l of 8M urea in 50 mM Tris-HCl, pH 8.2 and sonicated in a water bath for 5 min. Then 20  $\mu$ l of 1% ProteaseMAX in 10% acetonitrile (AcN)/50 mM Tris-HCl buffer was added before samples were sonicated in a water bath for 5 min and using a probe (a VibraCell probe (Sonics & Materials) at 2/2 s pulse with 40% amp for 1 min. Samples were transferred to a new sample tube and protein concentrations were determined by Pierce Micro BCA assay (ThermoFisher Scientific). Equal amounts (30  $\mu$ g) of proteins were taken and normalized to a buffer volume of 70  $\mu$ l with 50 mM Tris-HCl. Samples were reduced with 6  $\mu$ l of 100 mM dithiothreitol in 50 mM Tris-HCl and incubated at 37°C for 45 min followed by alkylation with 16  $\mu$ l of 100 mM iodoacetamide in 50 mM Tris-HCl incubated at room temperature (RT) for 30 min. Proteolytic digestion was performed with addition of 5  $\mu$ l of 0.1  $\mu$ g/ $\mu$ l sequencing grade trypsin (Promega), maintaining 1:50 ratio of enzyme:protein, incubating at 37°C overnight (16 hours). Digestion was stopped by adding 6  $\mu$ l of cc. formic acid (FA) before samples were cleaned on HyperSep C-18 plate with 40  $\mu$ l bed volume (Thermo Fisher Scientific) using the manufacturer's instructions. Eluted peptides were dried on a vacuum concentrator (Eppendorf).

### LC-MS/MS Data Acquisition and Data Analysis

Peptides reconstituted in solvent A (2% AcN/0.1% FA) were analyzed on an Ultimate 3000 UHPLC (Thermo Fisher Scientific) hyphenated to an Orbitrap™ Lumos™ mass spectrometer (Thermo Fisher Scientific, USA). Peptides were loaded in an Acclaim PepMap trap column, 2  $\mu$ m x 75  $\mu$ m ID x 2 cm (ThermoFisher Scientific) and separated in an EASY-Spray™ HPLC column, 2  $\mu$ m x 75  $\mu$ m ID x 50 cm (Thermo Fisher Scientific) using a 90 min linear gradient. Data was acquired in data dependent acquisition (DDA) mode, isolating precursors at 120,000 mass resolution in the mass range of  $m/z$  375 – 1500 in 3 s cycle time. The maximum injection time (IT) of 50 ms and dynamic exclusion of 30 s, precursors were isolated with 0.7 Th width. Tandem mass spectra were obtained using high collision energy of 28%, resolution of 15,000 and maximum IT of 22 ms.

Proteins were searched against UniProt *H. influenzae* (375177) database using the search engine Mascot Server v2.5.1 (MatrixScience) in Proteome Discoverer v2.5 software (Thermo Fisher Scientific) environment allowing maximum two missed cleavages for trypsin. Oxidation of methionine, deamidation of asparagine and glutamine were set as variable modifications, while carbamidomethylation of cysteine was used as fixed modification. The false discovery rate (FDR) was set to 1%.

## SUPPORTING FIGURES

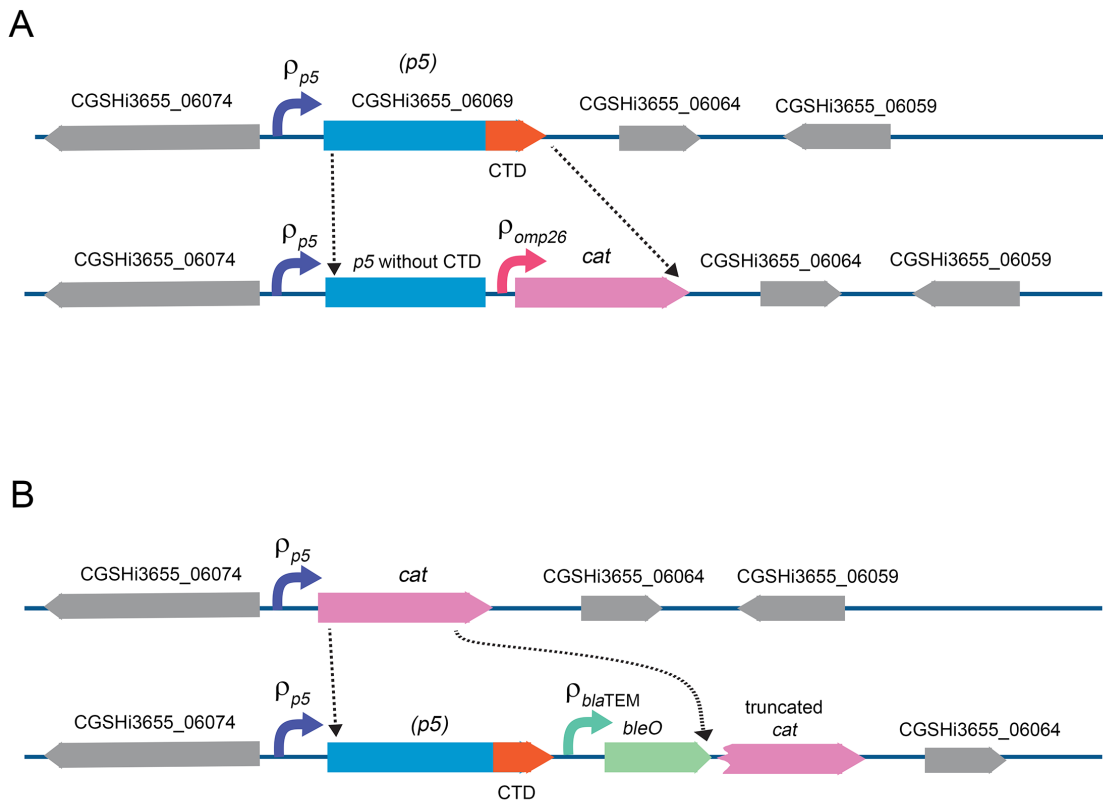

**Figure S1:** Schematic presentation of the construction of  $p5^{CTD}$ -knockout and  $p5$ -transcomplemented mutants in NTHi 3655. (A)  $p5^{CTD}$ -deletion in NTHi 3655 chromosome. Upper panel represents the loci map of  $p5$  (locus tag CGSHi3655\_06069 (GenBank number: EDJ92910)) in NTHi 3655.  $p5$  gene is flanked by CGSHi3655\_06074 at upstream and, CGSHi3655\_06064 and CGSHi3655\_06059 at downstream. Open reading frame (ORF) of CTD of P5 ( $p5^{CTD}$ ) is located at nucleotide (nt) 697-1080 in  $p5$  gene. Lower panel indicates the genetic map of NTHi 3655 $\Delta p5^{CTD}$ . To knockout  $p5^{CTD}$ , the upstream (labelled as Fragment A, 1244 bp) and downstream (Fragment B, 997 bp) flanking regions of the  $p5^{CTD}$  were amplified by PCR from NTHi 3655 genomic DNA using specific primer listed in Table S2. Fragment A consists of partial 5' end of CGSHi3655\_06074, promoter  $p5$  ( $\rho_{p5}$ ) and 5' part of  $p5$  ORF (nucleotide 1-696). Fragment B contain CGSHi3655\_06064 and partial 3' end of CGSHi3655\_06059. Of note, an additional stop codon (TAA) was added at the 3' end of the partial ORF of  $p5$  (nucleotide 1-696+TAA) to ensure the expression of P5 lacking CTD. The ORF of antibiotic resistance genes of chloramphenicol acetyltransferase ( $cat$ ) (AY219687.1) was amplified from our in-house designed synthetic plasmid pUC- $\rho_{omp26}$ -Cm (GenScript) using specific primers (Table S2). Transcription of  $cat$  was driven by promoter ( $\rho_{omp26}$ ) of  $omp26$  (CGSHi3655\_07564) of NTHi 3655. The  $\rho_{omp26}$ - $cat$  (806 bp) was then fused to Fragment B by overlapping PCR to create Fragment C (1760 bp). Overlapping PCR was performed to combine Fragment A and C and generate a linear  $p5^{CTD}$ -knockout vector (2958 bp). The linear DNA vector was transformed into NTHi 3655 wild type to replace the  $p5^{CTD}$  (nt 697-1080) with  $\rho_{omp26}$ - $cat$  while retaining the ORF of the remaining transmembrane and extracellular loops of P5 (nt 1-696+stop codon), yielding NTHi 3655 $\Delta p5^{CTD}$  mutant. (B) Transcomplementation of  $p5$  into NTHi 3655 $\Delta p5$ . Upper panel represents the loci map of  $p5$ -knockout mutant. Lower panel shows the genetic map of transcomplemented- $p5$  into  $\Delta p5$  background mutant. For  $p5$

transcomplementation, DNA fragment (labelled as Fragment D (1620 bp)) (consists of partial 5' end of CGSHi3655\_06074, promoter  $p5$  ( $\rho_{p5}$ ) and full ORF of  $p5$  (nucleotide 1-1080)) was first amplified from NTHi 3655 wild type genomic DNA with specific primers listed in Table S2. Second DNA fragment (Fragment E (1656 bp)) (consists of partial ORF of  $cat$ , CGSHi3655\_06064 and partial 3' end of CGSHi3655\_06059) was amplified from the genomic DNA of NTHi 3655 $\Delta p5$  mutant. Of note, the ORF of  $cat$  in Fragment E is no longer functional because it did not have promoter and start codon. The ORF of phleomycin/zeocin-binding protein ( $bleO$ ) (MT445781.1) was amplified from our in-house designed synthetic plasmid pUC- $\rho_{bla_{TEM}}$ -Zeo (GenScript) with specific primers (Table S2). Here the promoter ( $\rho_{bla_{TEM}}$ ) of  $\beta$ -lactamase TEM of NTHi 86-028NP (ABU87507.1) was used to transcribe  $bleO$ . The resulting PCR product of  $\rho_{bla_{TEM}}$ - $bleO$  (716 bp) was then fused to Fragment E in the order of 5' to 3' to form Fragment F (2328 bp) by overlapping PCR. Finally, overlapping PCRs were performed to combine Fragment D and F to generate a linear  $p5$ -transcomplemented vector. The DNA vector was lastly transformed into NTHi 3655 $\Delta p5$  to disrupt the  $cat$  ORF and replaced with the complete ORF of  $p5$  with its endogenous promoter ( $\rho_{p5}$ ), generating a  $p5$ -transcomplemented mutant, NTHi 3655 $\Delta p5::p5$ . For panel A and B, transformation of linear vectors into NTHi 3655 wild type and  $\Delta p5$  was carried out according to the procedure of Poje and Redfield (2003).  $p5^{CTD}$ -knockout and  $p5$ -transcomplemented mutants were selected on chocolate agar containing Cm (10  $\mu$ g/mL) and Zeo (4  $\mu$ g/mL), respectively. All mutants were characterized and confirmed by DNA sequencing and growth curve analysis. SDS-PAGE, western blotting and flow cytometry were also performed for detection of P5 with rabbit anti-P5<sup>loop3</sup> polyclonal antibody (pAb) (Genscript, Piscataway, NJ) (Thofte et al., 2021).

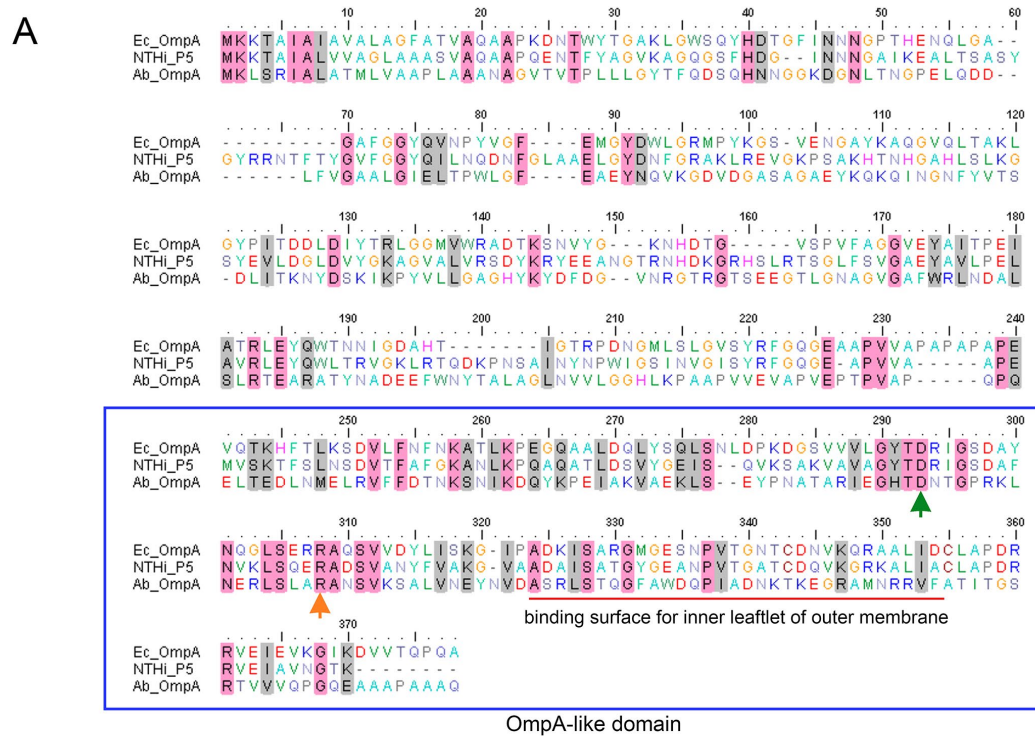

**B**

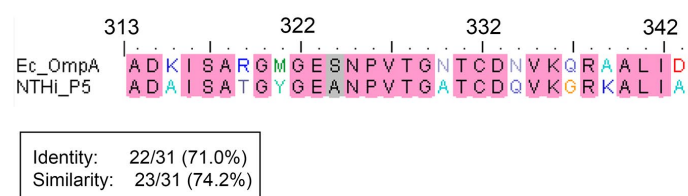

**Figure S2:** Sequence analysis reveals the presence of OmpA-like domain at the C-terminal (CTD) of P5. (A) Full length sequence alignment between P5 of NTHi 3655 (GenBank accession number: EDJ92910) and OmpA from *E. coli* (P0A910) and *Acinetobacter baumannii* (Q6RYW5). Clustal Omega (<https://www.ebi.ac.uk/Tools/msa/clustalo/>) was used to perform multiple sequence alignment. We used OmpA of *E. coli* and *A. baumannii* as the protein models for P5 since these two proteins are the most well studied OmpA-like family proteins at the molecular and structural levels (Park et al., 2012; Samsudin et al., 2016). Full length P5 of NTHi 3655 shared 46.8% and 57.9% of sequence identity and similarity with the whole molecule of OmpA from *E. coli*, respective; and 25.1% and 37.6% of sequence identity and similarity with OmpA of *A. baumannii*, respectively. Conserved residues are in pink shading, and similar residues are in grey shading, which are more apparent within the OmpA-like domain (blue box). Green and orange arrows indicate two key residues D283 and R298 (residue number based on P5 protein sequence) that are essential in peptidoglycan binding. Red line indicates region that form contact with the inner leaflet of outer membrane (OM). (B) Sequence homology of “inner leaflet of OM”-binding region (A313 and A343) between *E. coli* OmpA of and NTHi P5. Interestingly, region between A313 and A343 of P5 shared reasonable sequence similarity (74.2%) with the OM-binding surface of OmpA. This suggests the

possibility of CTD of P5 to interact with lipid group of the inner leaflet of OM as observed for *E. coli* OmpA.

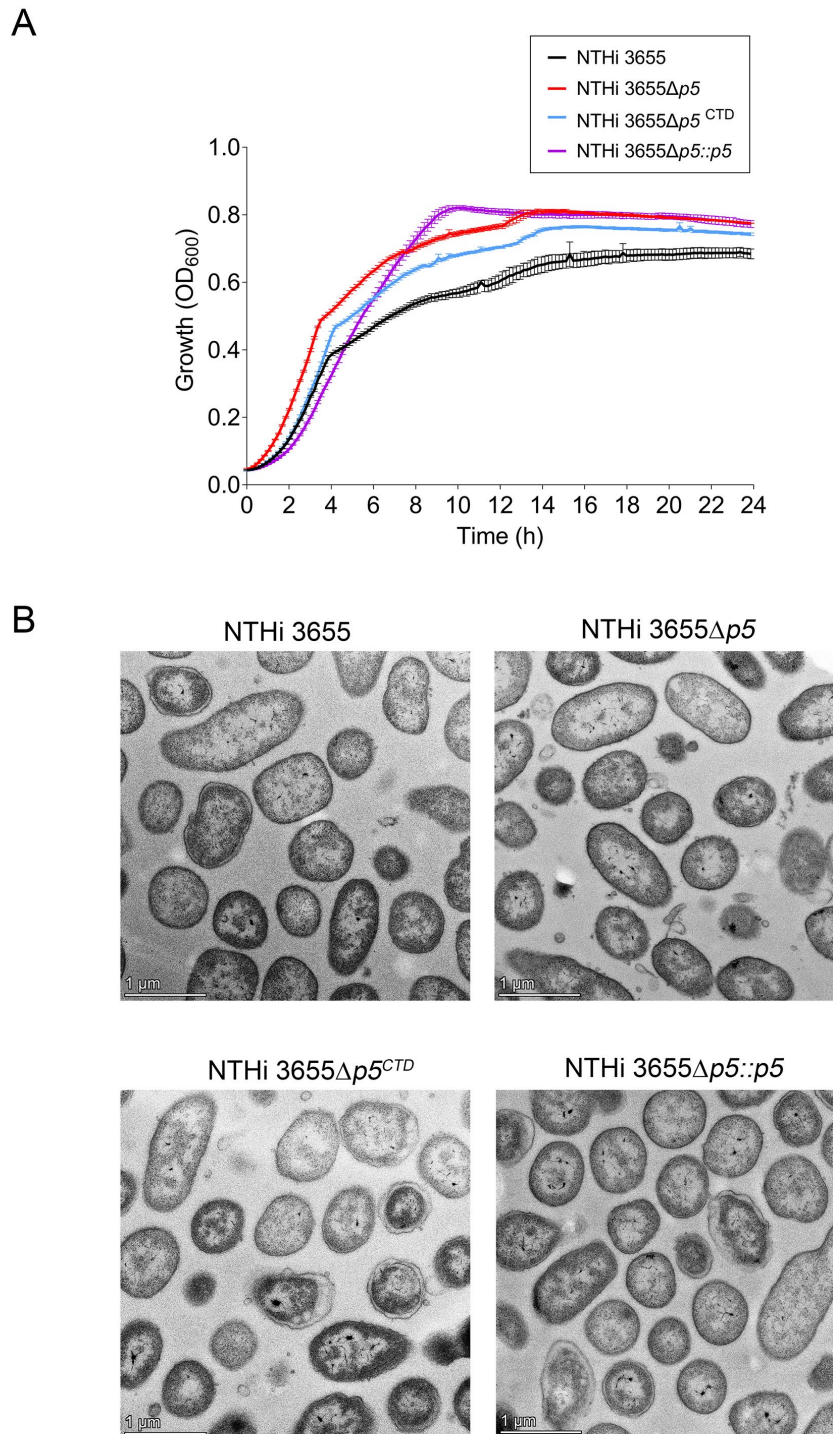

**Figure S3.** NTHi growth and cellular morphology in response to genetical deletion of  $p5^{CTD}$  or entire  $p5$  and  $p5$  transcomplementation. (A) Bacterial growth curves based on absorbance at 600 nm. Briefly, bacterial suspensions were prepared from fresh colonies and adjusted to  $OD_{600}=0.05$  in brain heart infusion (BHI) broth supplemented with 10  $\mu\text{l}/\text{ml}$  of each NAD and hemin. The bacterial suspension (100  $\mu\text{l}$ ) was loaded in triplicates into 96-well plates and sealed

with Breath easy seal (Diversified Biotech, Dedham, WA). Plate was measured using TECAN SparkControl™ multimode plate reader (Tecan, Switzerland) with the setting of 15 min interval reads for 24 hours at 37°C, 5 % CO<sub>2</sub>, and orbital shaking (1 mm amplitude). Data were analysed using SPARK Control software Version v 3.1 SP1. Data shown is a representative experiment from three independent repeated experiments. Data represent mean values of three technical replicates derived from one representative experiment. Error bars indicate standard deviations. NTHi 3655 $\Delta p5$  and  $\Delta p5^{CTD}$  mutants, as well as  $\Delta p5::p5$  did not exhibit growth defect compared to the NTHi 3655 wild type rather a slight faster growth rate was observed among the mutants. (B) Visualization of bacterial cellular morphology by transmission electron microscope (TEM). TEM analysis were repeated three times and images from one representative analysis were shown. We did not observe any apparent changes in cell shapes and cell envelopes between the NTHi 3655 wild type, the isogenic mutants (NTHi 3655 $\Delta p5$  and  $\Delta p5^{CTD}$ ) and the transcomplemented mutant (NTHi 3655 $\Delta p5::p5$ ). The procedure for TEM was as described in (Thofte et al., 2021). Briefly, for TEM sample preparation, bacteria colonies were picked from the plate, fixated in 2.5% glutaraldehyde phosphate buffer and treated with 1% OsO<sub>4</sub>. Samples were washed and further dehydrated in an ethanol gradient series, and then infiltrated with increasing concentrations of LR white resin in ethanol (1:3, 1:1, 3:1) and added with 100% resin. The infiltration steps were performed with PELCO BioWave (Ted Pella). Samples were polymerized overnight at 65°C, sectioned to ultrathin 70 nm ribbons using Ultracut S ultramicrotome (Leica Microsystems) with a diamond knife (Diatome), placed on formvar coated copper grids and contrasted with uranyl acetate and lead citrate. The samples were examined with a FEI Talos L120 TEM (Thermo Fisher Scientific). Micrograph images were acquired with FEI Ceta CMOS detector (Thermo Fisher Scientific) with 16k pixels. Electron microscopy preparation and analysis were carried out at Umeå Centre for Electron Microscopy (UCEM) at Umeå university (Sweden). A scale bar indicating 1  $\mu$ m is inserted into all images.

## REFERENCES

- Musser, J.M., Barenkamp, S.J., Granoff, D.M., and Selander, R.K. (1986). Genetic relationships of serologically nontypable and serotype b strains of *Haemophilus influenzae*. *Infect Immun* 52(1), 183-191. doi: 10.1128/iai.52.1.183-191.1986.
- Park, J.S., Lee, W.C., Yeo, K.J., Ryu, K.S., Kumarasiri, M., Heseck, D., et al. (2012). Mechanism of anchoring of OmpA protein to the cell wall peptidoglycan of the gram-negative bacterial outer membrane. *FASEB J* 26(1), 219-228. doi: 10.1096/fj.11-188425.
- Poje, G., and Redfield, R.J. (2003). Transformation of *Haemophilus influenzae*. *Methods Mol Med* 71, 57-70. doi: 10.1385/1-59259-321-6:57.
- Samsudin, F., Ortiz-Suarez, M.L., Piggot, T.J., Bond, P.J., and Khalid, S. (2016). OmpA: A Flexible Clamp for Bacterial Cell Wall Attachment. *Structure* 24(12), 2227-2235. doi: 10.1016/j.str.2016.10.009.
- Su, Y.C., Mattsson, E., Singh, B., Jalalvand, F., Murphy, T.F., and Riesbeck, K. (2019). The Laminin Interactome: A Multifactorial Laminin-Binding Strategy by Nontypeable *Haemophilus influenzae* for Effective Adherence and Colonization. *J Infect Dis* 220(6), 1049-1060. doi: 10.1093/infdis/jiz217.



- Su, Y.C., Mukherjee, O., Singh, B., Hallgren, O., Westergren-Thorsson, G., Hood, D., et al. (2016). *Haemophilus influenzae* P4 Interacts With Extracellular Matrix Proteins Promoting Adhesion and Serum Resistance. *J Infect Dis* 213(2), 314-323. doi: 10.1093/infdis/jiv374.
- Thofte, O., Bettoni, S., Su, Y.C., Thegerstrom, J., Jonsson, S., Mattsson, E., et al. (2021). Nontypeable *Haemophilus influenzae* P5 Binds Human C4b-Binding Protein, Promoting Serum Resistance. *J Immunol* 207(6), 1566-1577. doi: 10.4049/jimmunol.2100105.
